# Supplementary material for: Pestalotiones A–D: Four New Secondary Metabolites from the Plant Endophytic Fungus Pestalotiopsis Theae
Source: PubMed Central journal article supplement (PMC7037426; doi:10.3390/molecules25030470), 2020-01-22

## Supporting Information

# **Pestalotones A–D, four new secondary metabolites from the plant endophytic fungus *Pestalotiopsis theae***

Longfang Guo <sup>1,2,Δ</sup>, Jie Lin <sup>3,Δ</sup>, Shubin Niu<sup>4</sup>, Shuchun Liu <sup>1</sup>, Ling Liu <sup>1,\*</sup>

<sup>1</sup> State Key Laboratory of Mycology, Institute of Microbiology, Chinese Academy of Sciences, Beijing 100101, China

<sup>2</sup> University of Chinese Academy of Sciences, Beijing 100039, China

<sup>3</sup> Jiangsu Key Laboratory for Biofunctional Molecules, College of Life Science and Chemistry, Jiangsu Second Normal University, Nanjing, China

<sup>4</sup> School of Biological Medicine, Beijing City University, Beijing 100083, China

\* Corresponding author: Tel: 86-10-64806153; E-mail: liul@im.ac.cn

Δ Contributed equally to this work.

|                                                                                                                        |    |
|------------------------------------------------------------------------------------------------------------------------|----|
| Figure S1. $^1\text{H}$ NMR spectrum of pestalotione A ( <b>1</b> ; 500 MHz, $\text{DMSO-}d_6$ ).....                  | 3  |
| Figure S2. $^{13}\text{C}$ NMR spectrum of pestalotione A ( <b>1</b> ; 125 MHz, $\text{DMSO-}d_6$ ) .....              | 4  |
| Figure S3. HSQC spectrum of pestalotione A ( <b>1</b> ; 500 MHz, $\text{DMSO-}d_6$ ).....                              | 5  |
| Figure S4. HMBC spectrum of pestalotione A ( <b>1</b> ; 500 MHz, $\text{DMSO-}d_6$ ).....                              | 6  |
| Figure S5. $^1\text{H}$ NMR spectrum of pestalotione B ( <b>2</b> ; 500 MHz, $\text{acetone-}d_6$ ) .....              | 7  |
| Figure S6. $^{13}\text{C}$ NMR spectrum of pestalotione B ( <b>2</b> ; 125 MHz, $\text{acetone-}d_6$ ).....            | 8  |
| Figure S7. HSQC spectrum of pestalotione B ( <b>2</b> ; 500 MHz, $\text{acetone-}d_6$ ) .....                          | 9  |
| Figure S8. HMBC spectrum of pestalotione B ( <b>2</b> ; 500 MHz, $\text{acetone-}d_6$ ).....                           | 10 |
| Figure S9. $^1\text{H}$ NMR spectrum of pestalotione C ( <b>7</b> ; 400 MHz, $\text{methanol-}d_4$ ) .....             | 11 |
| Figure S10. $^{13}\text{C}$ NMR spectrum of pestalotione C ( <b>7</b> ; 100 MHz, $\text{methanol-}d_4$ ).....          | 12 |
| Figure S11. $^1\text{H-}^1\text{H}$ COSY spectrum of pestalotione C ( <b>7</b> ; 400 MHz, $\text{methanol-}d_4$ )..... | 13 |
| Figure S12. HSQC spectrum of pestalotione C ( <b>7</b> ; 400 MHz, $\text{methanol-}d_4$ ) .....                        | 14 |
| Figure S13. HMBC spectrum of pestalotione C ( <b>7</b> ; 400 MHz, $\text{methanol-}d_4$ ) .....                        | 15 |
| Figure S14. $^1\text{H}$ NMR spectrum of pestalotione D ( <b>8</b> ; 400 MHz, $\text{CDCl}_3$ ) .....                  | 16 |
| Figure S15. $^{13}\text{C}$ NMR spectrum of pestalotione D ( <b>8</b> ; 100 MHz, $\text{CDCl}_3$ ).....                | 17 |
| Figure S16. HSQC spectrum of pestalotione D ( <b>8</b> ; 400 MHz, $\text{CDCl}_3$ ) .....                              | 18 |
| Figure S17. HMBC spectrum of pestalotione D ( <b>8</b> ; 400 MHz, $\text{CDCl}_3$ ) .....                              | 19 |

Figure S1.  $^1\text{H}$  NMR spectrum of pestalotione A (**1**; 500 MHz,  $\text{DMSO-}d_6$ )

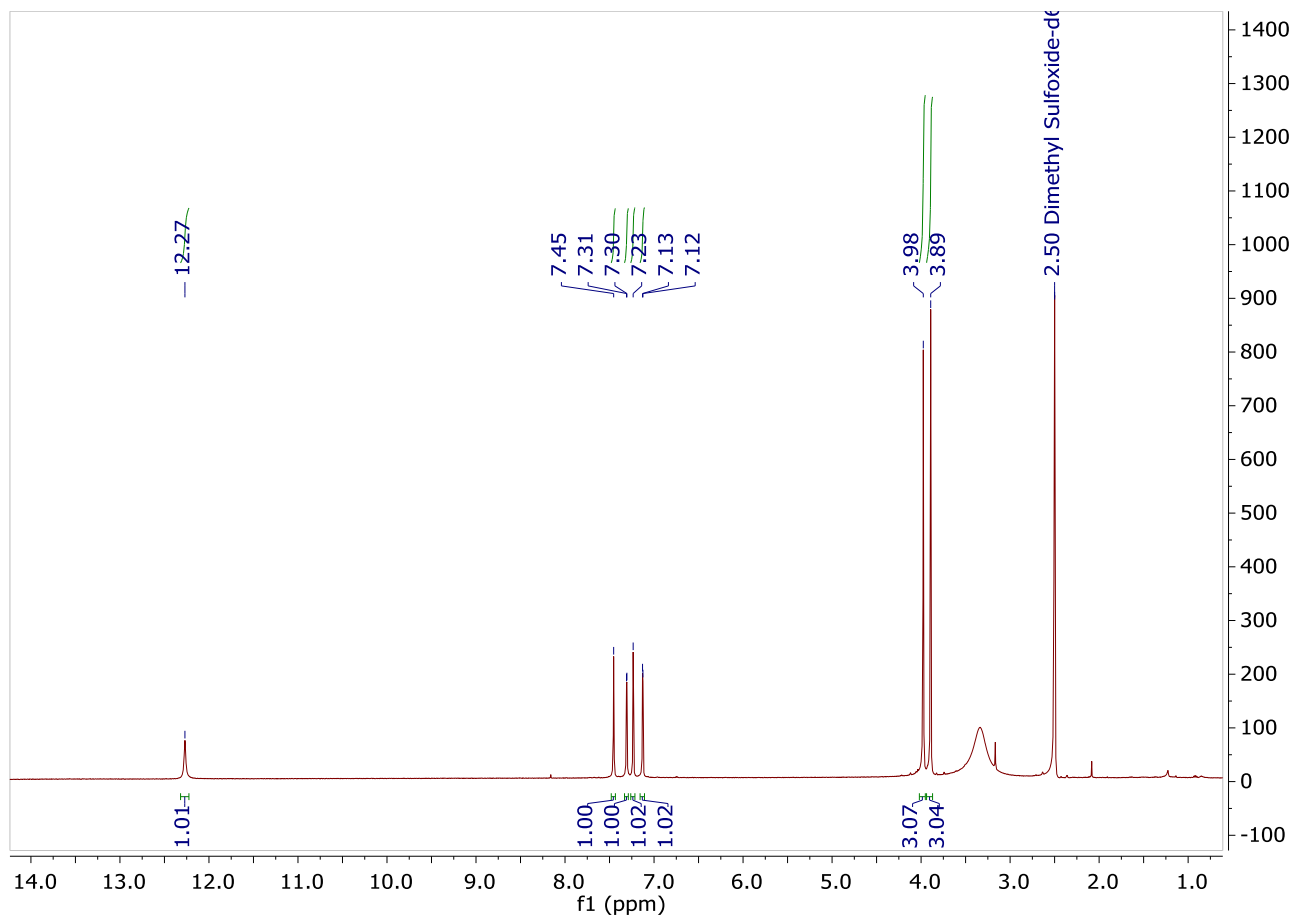

Figure S2.  $^{13}\text{C}$  NMR spectrum of pestalotione A (**1**; 125 MHz,  $\text{DMSO-}d_6$ )

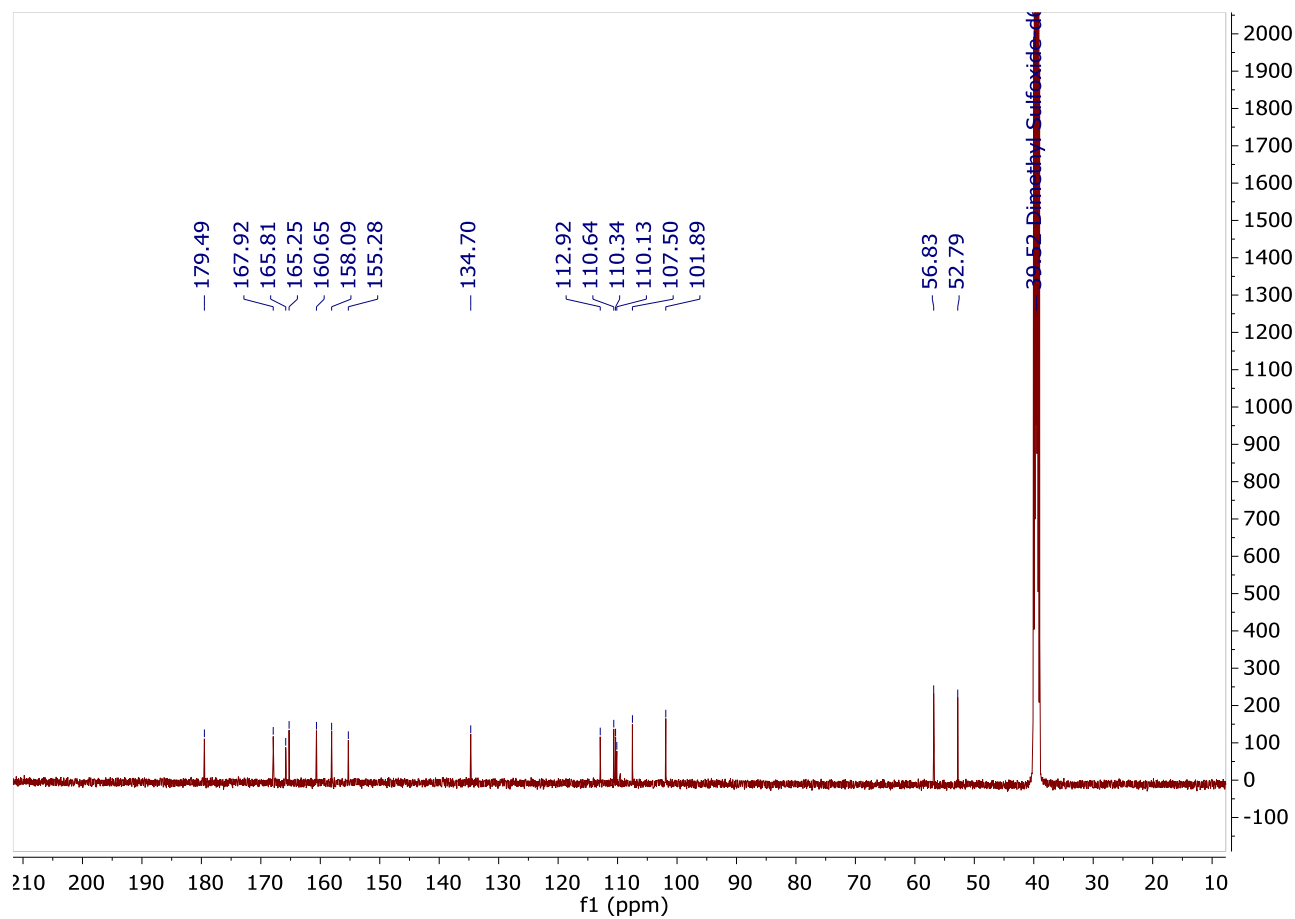

Figure S3. HSQC spectrum of pestalotione A (**1**; 500 MHz, DMSO-*d*<sub>6</sub>)

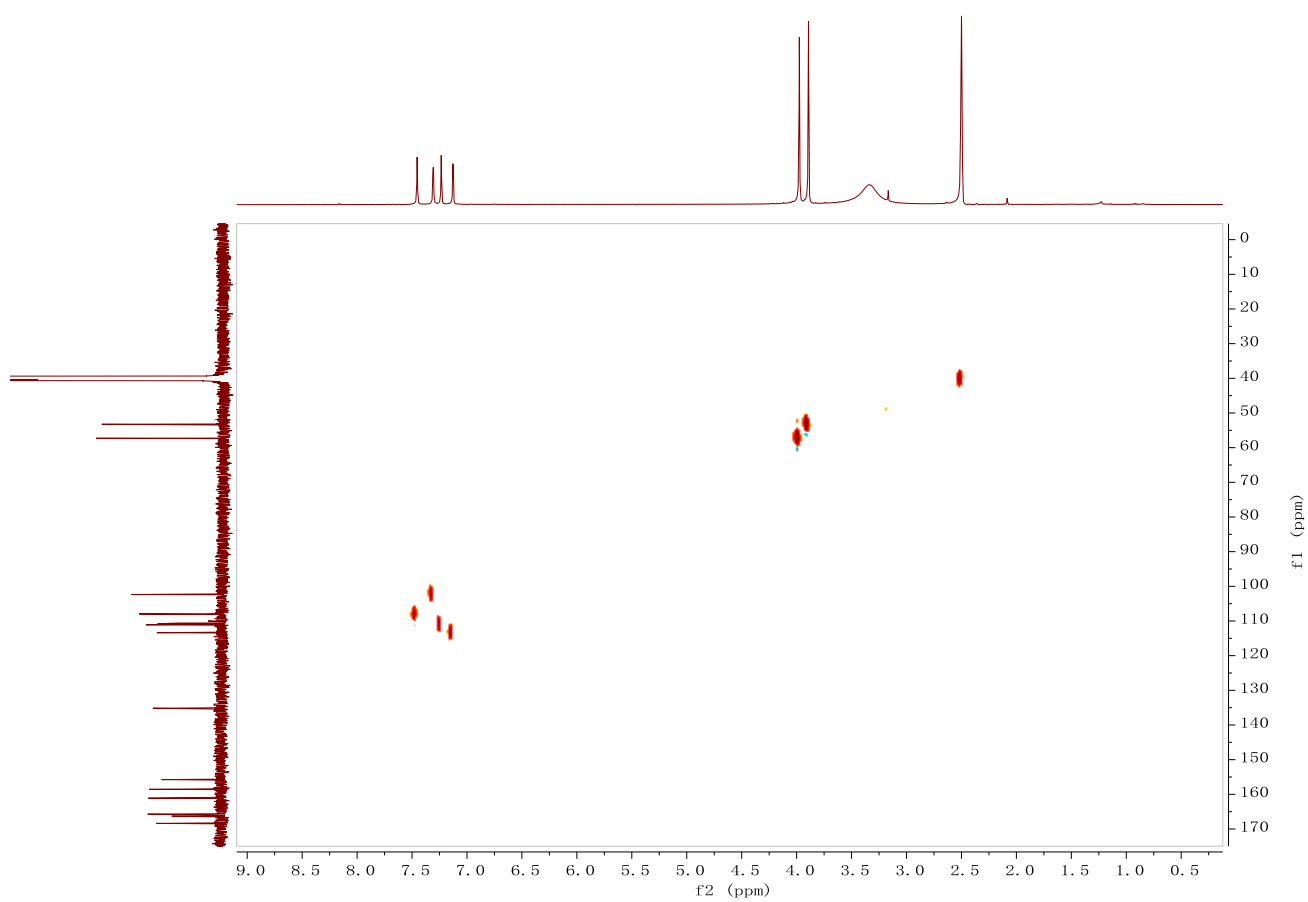

Figure S4. HMBC spectrum of pestalotione A (**1**; 500 MHz, DMSO-*d*<sub>6</sub>)

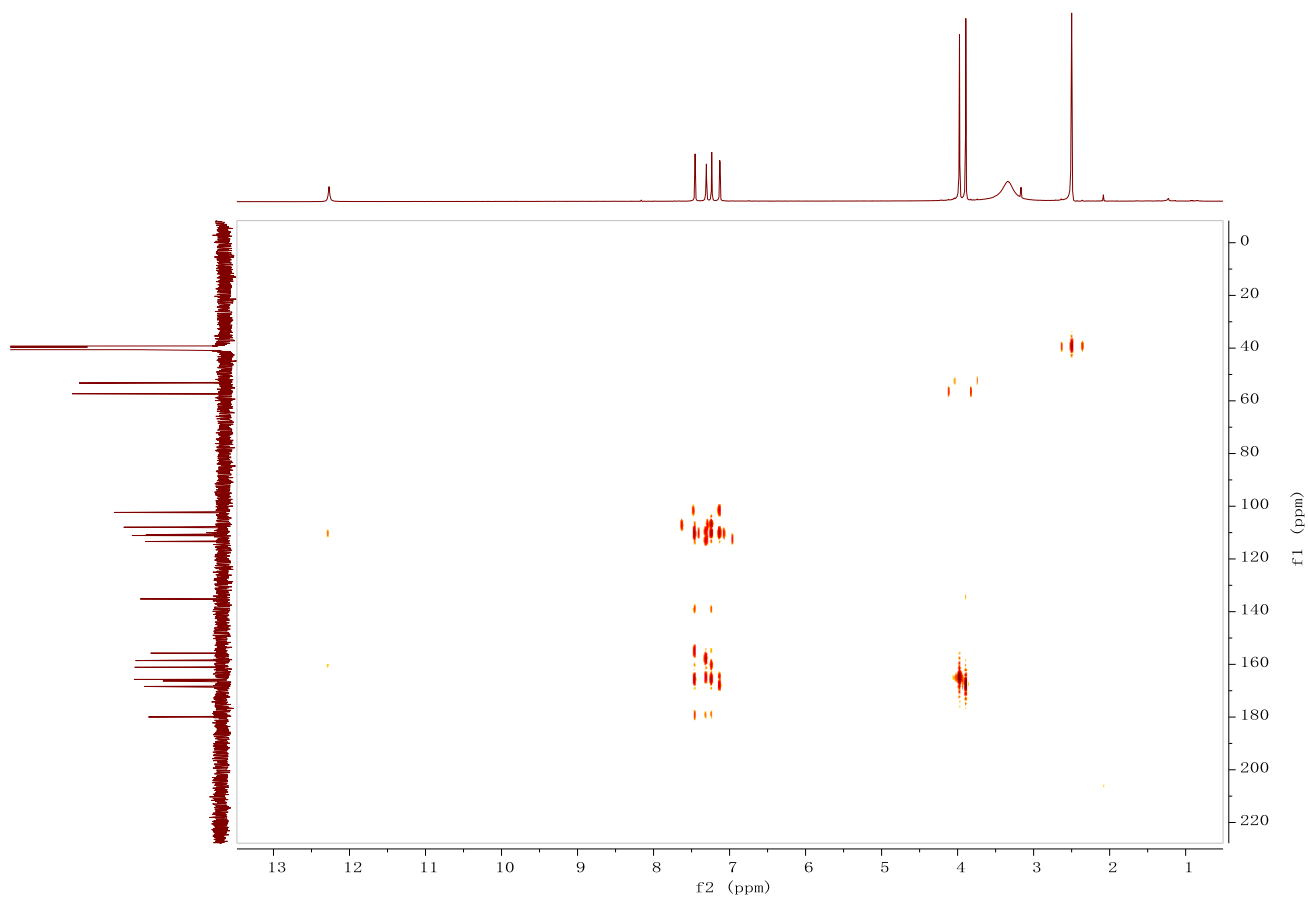

Figure S5.  $^1\text{H}$  NMR spectrum of pestalotione B (**2**; 500 MHz, acetone- $d_6$ )

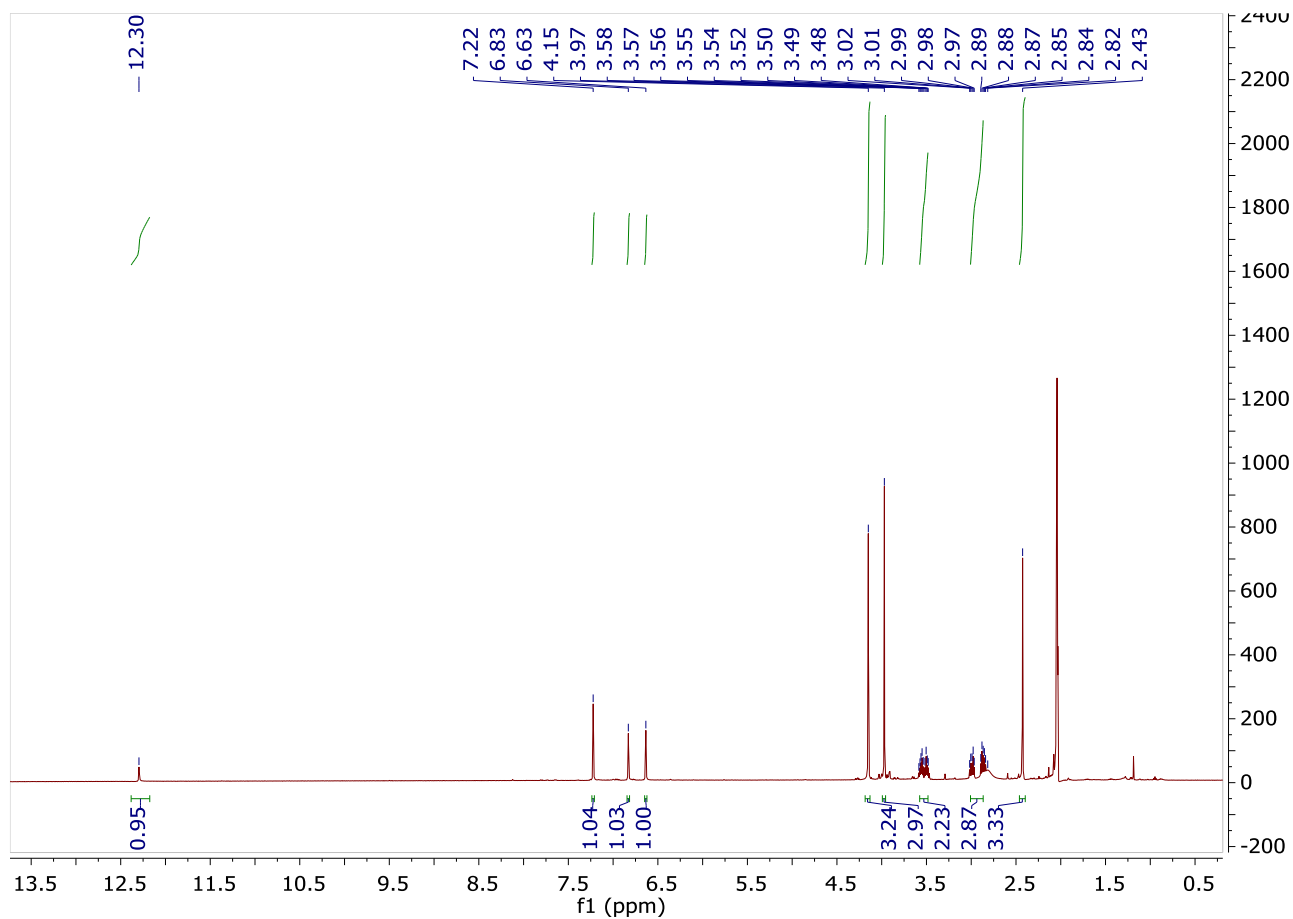

Figure S6.  $^{13}\text{C}$  NMR spectrum of pestalotione B (**2**; 125 MHz, acetone- $d_6$ )

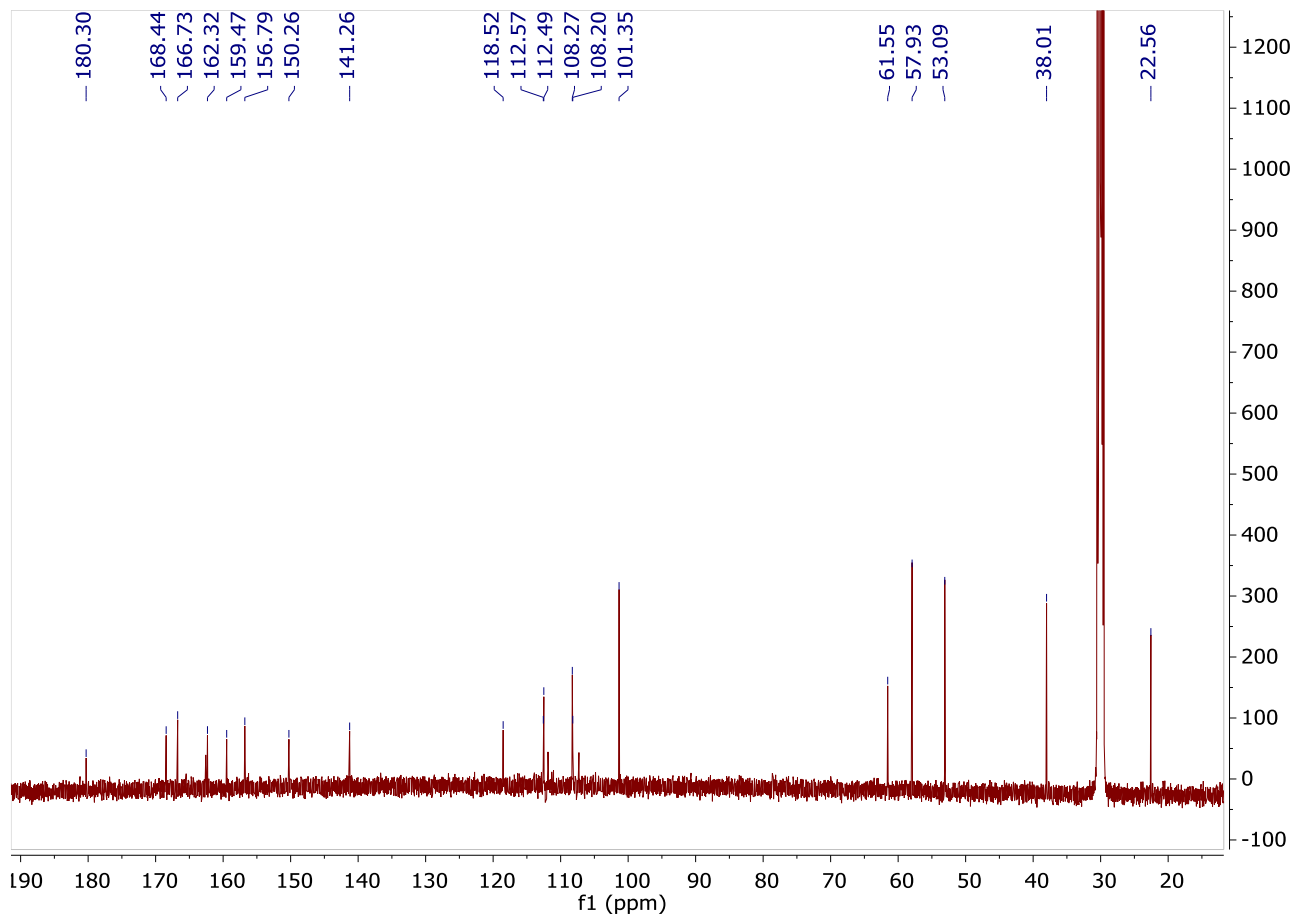



Figure S7. HSQC spectrum of pestalotione B (2; 500 MHz, acetone- $d_6$ )

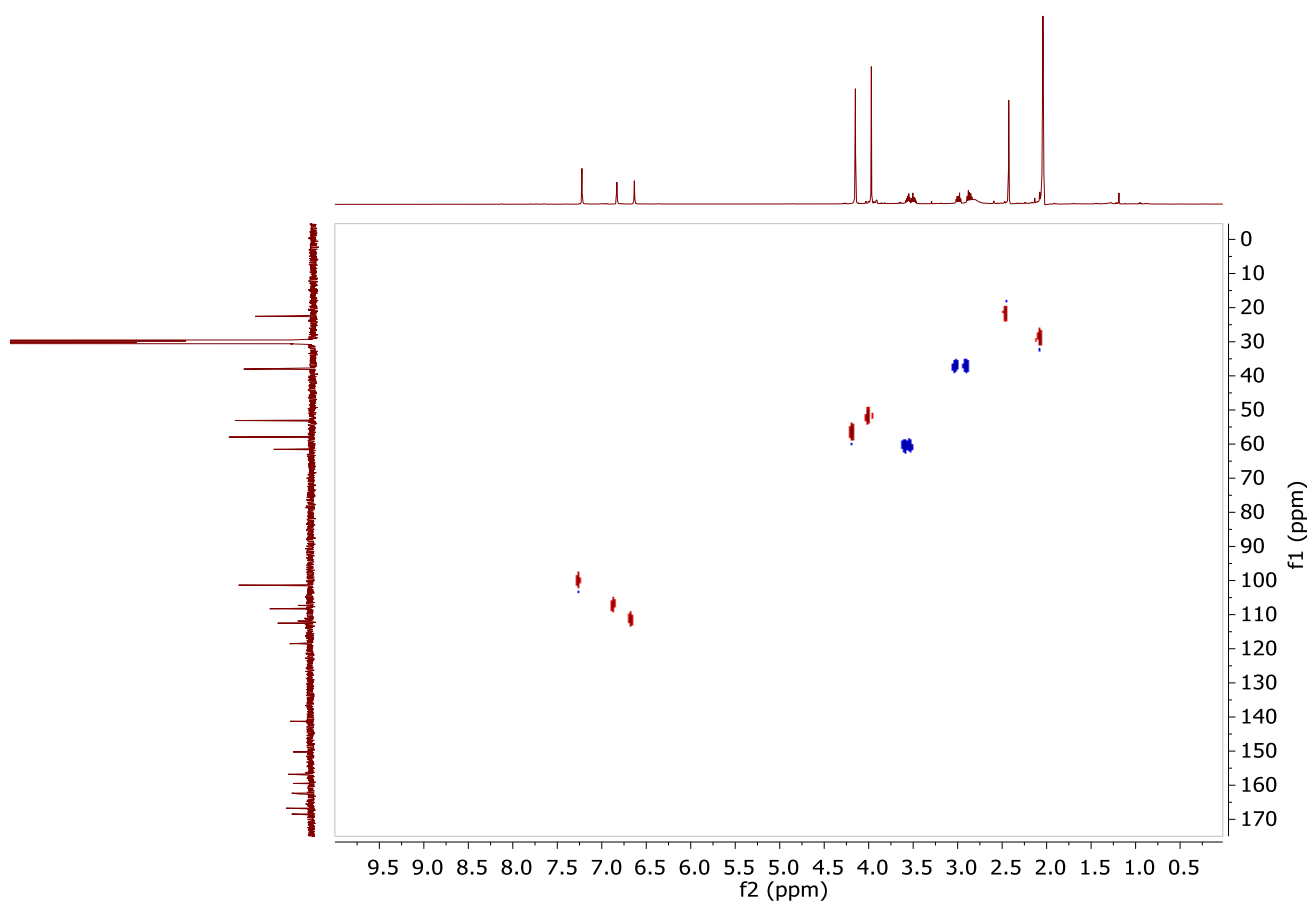

Figure S8. HMBC spectrum of pestalotione B (2; 500 MHz, acetone- $d_6$ )

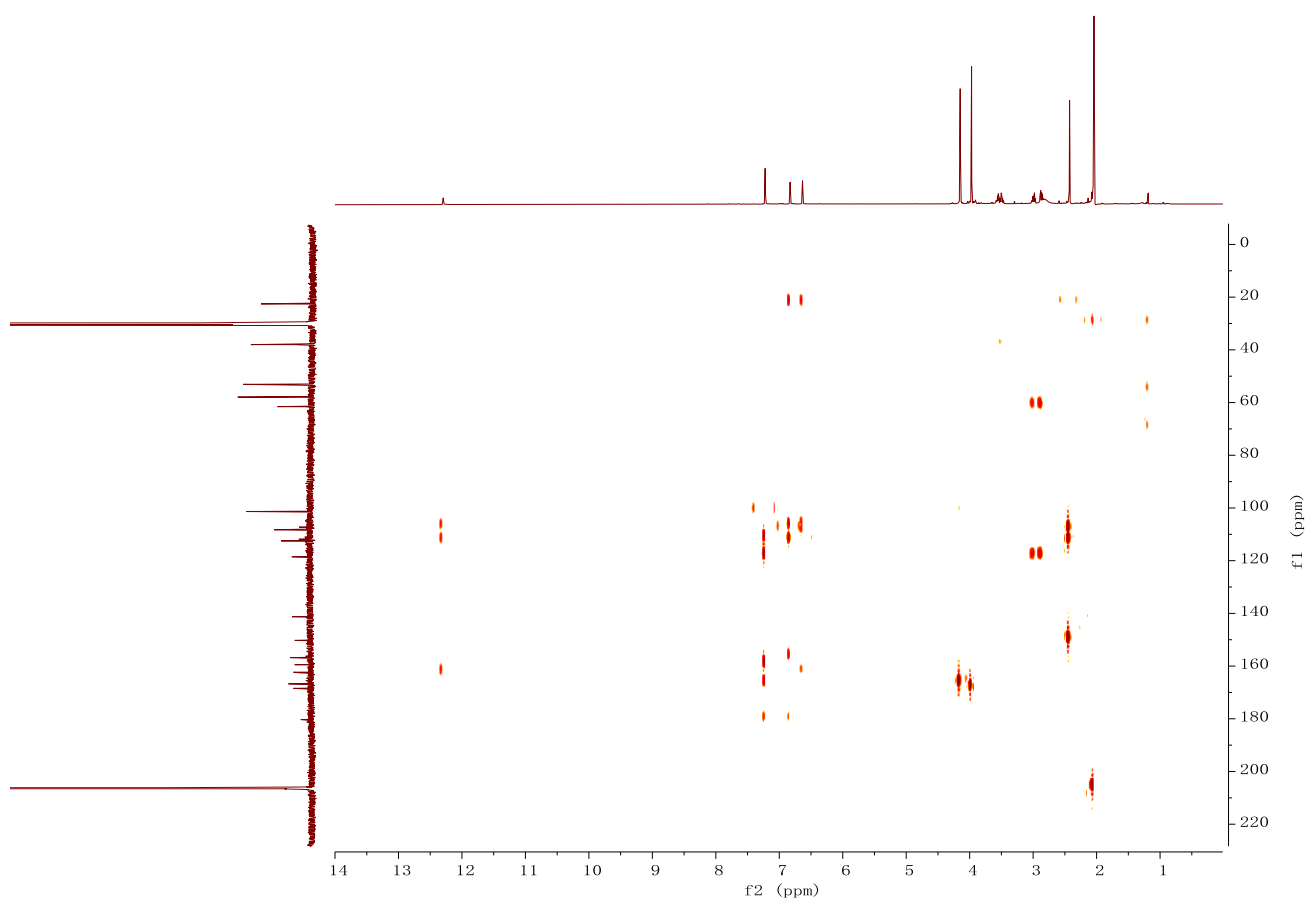

**Fig. S9**  $^1\text{H}$  NMR spectrum of pestalotione C (**7**; 400 MHz, methanol- $d_4$ )

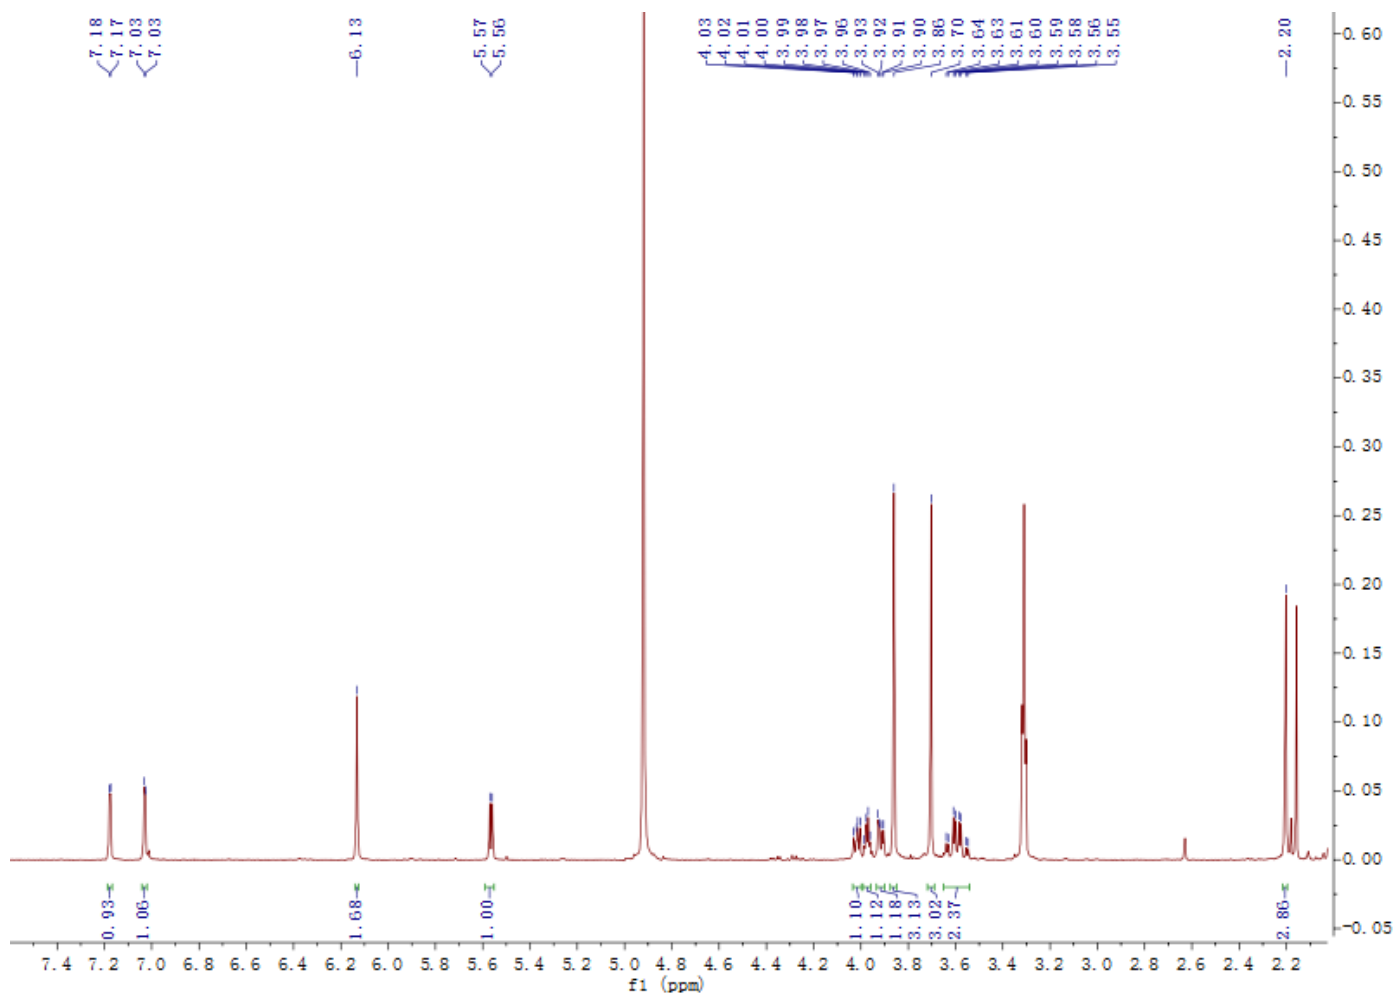

**Fig. S10**  $^{13}\text{C}$  NMR spectrum of pestalotione C (**7**; 100 MHz, methanol- $d_4$ )

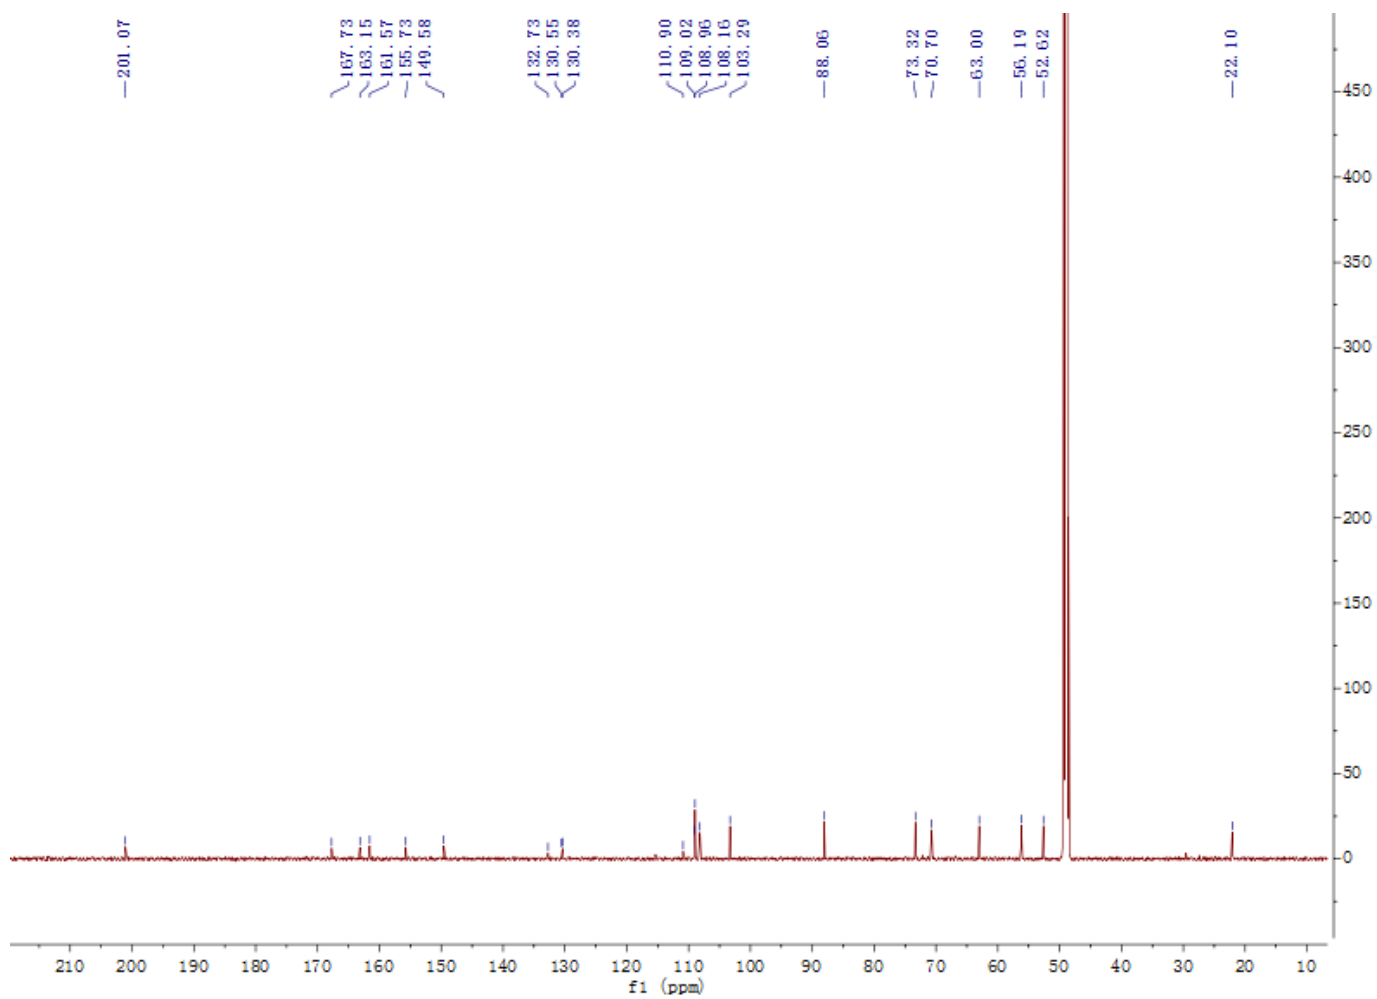

**Fig. S11**  $^1\text{H}$ - $^1\text{H}$  COSY spectrum of pestalotione C (**7**; 400 MHz, methanol- $d_4$ )

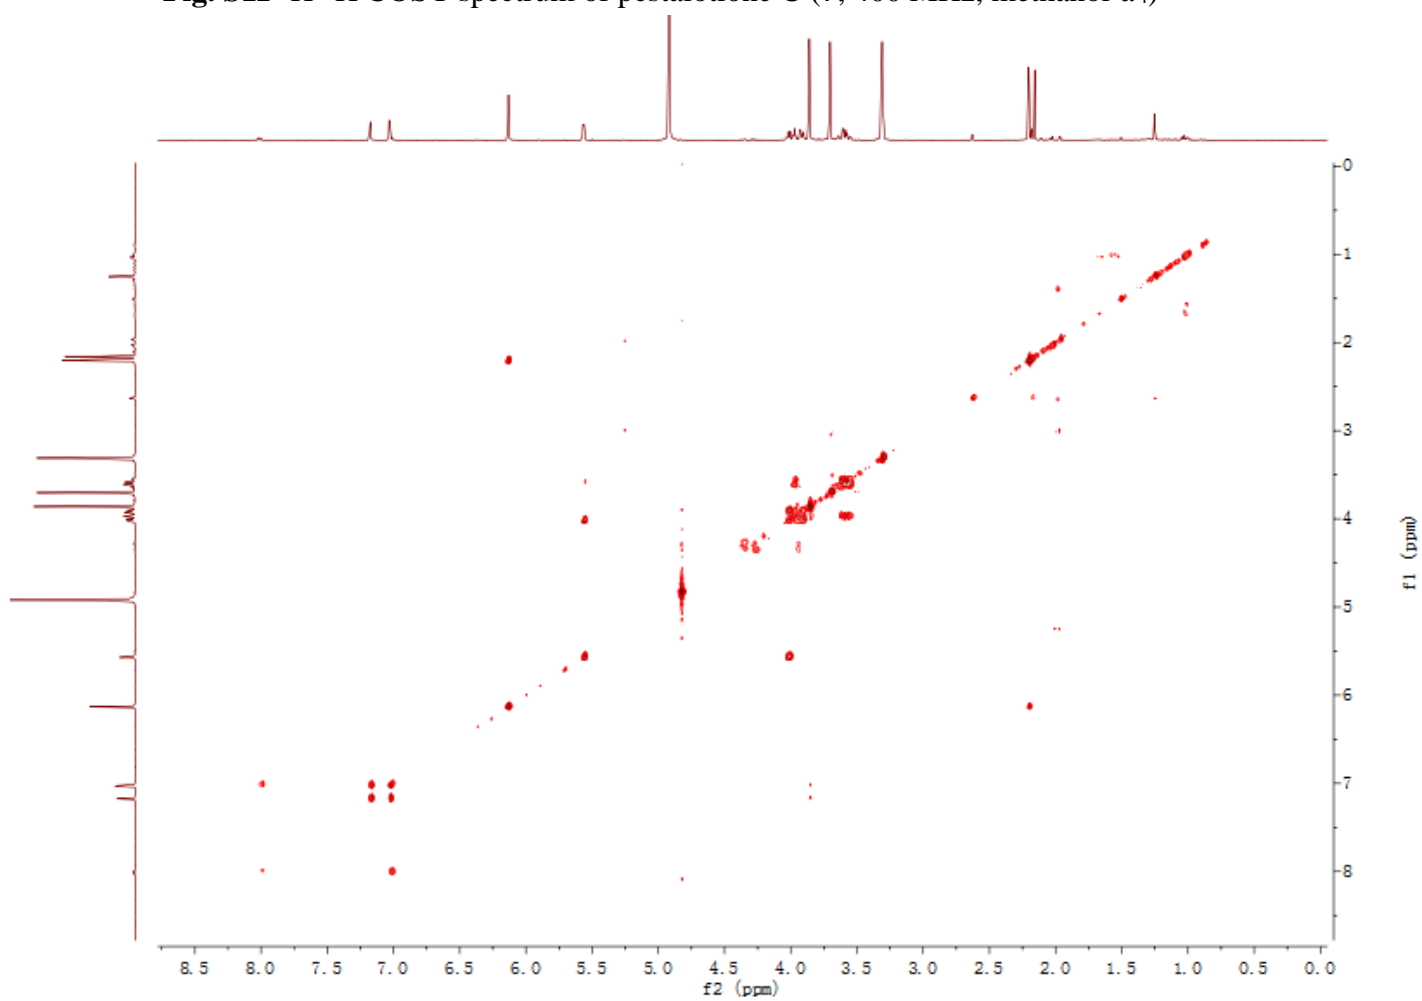

**Fig. S12** HSQC spectrum of pestalotione C (**7**; 400 MHz, methanol-*d*<sub>4</sub>)

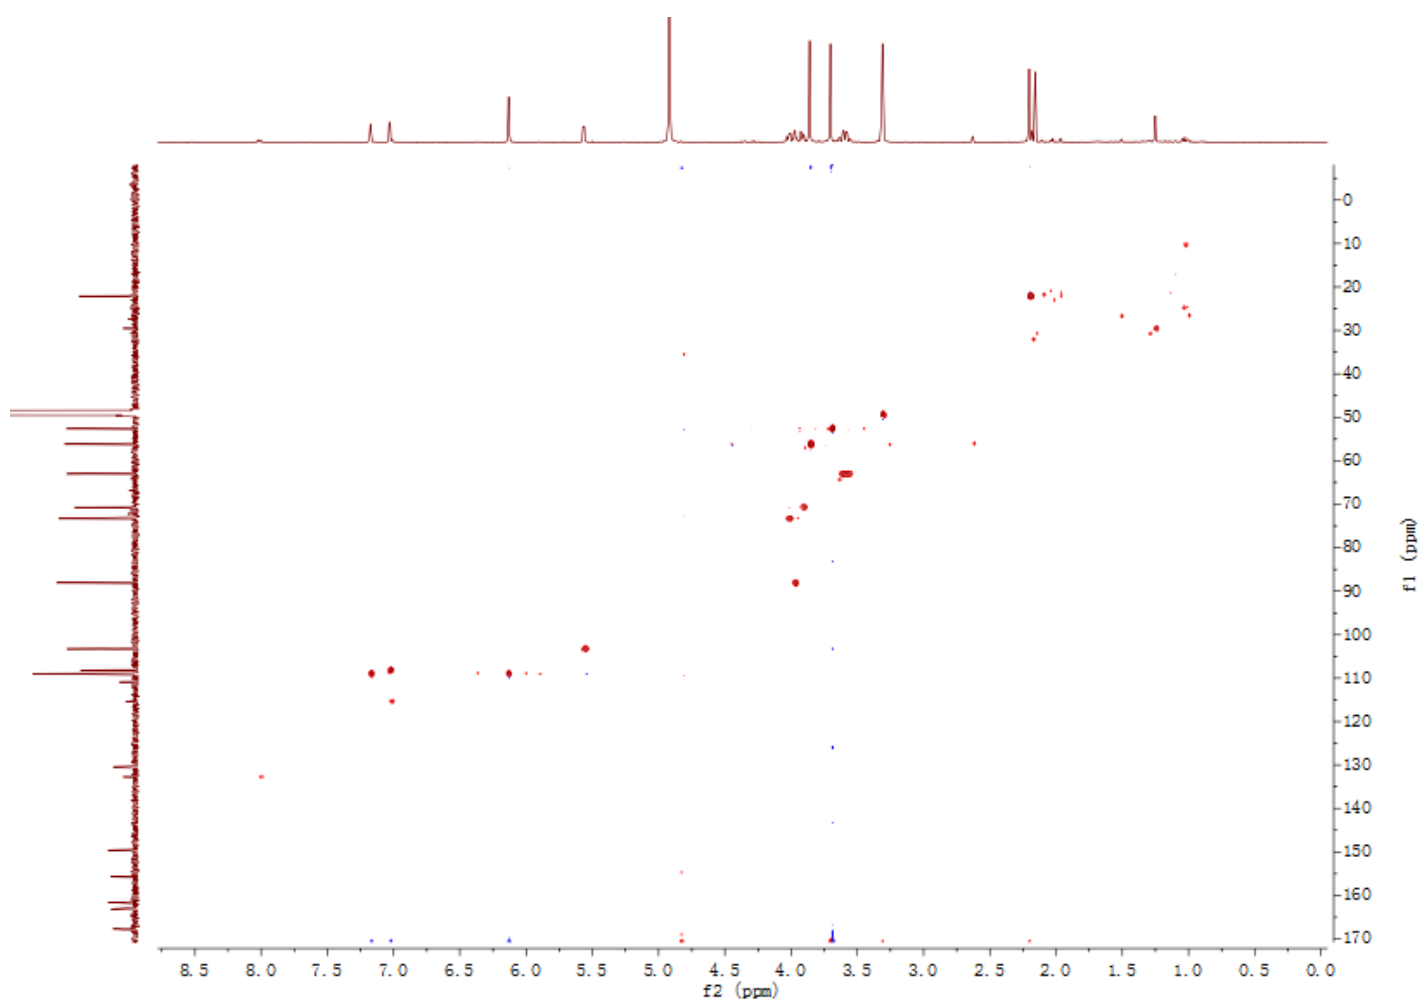

**Fig. S13** HMBC spectrum of pestalotione C (**7**; 400 MHz, methanol-*d*<sub>4</sub>)

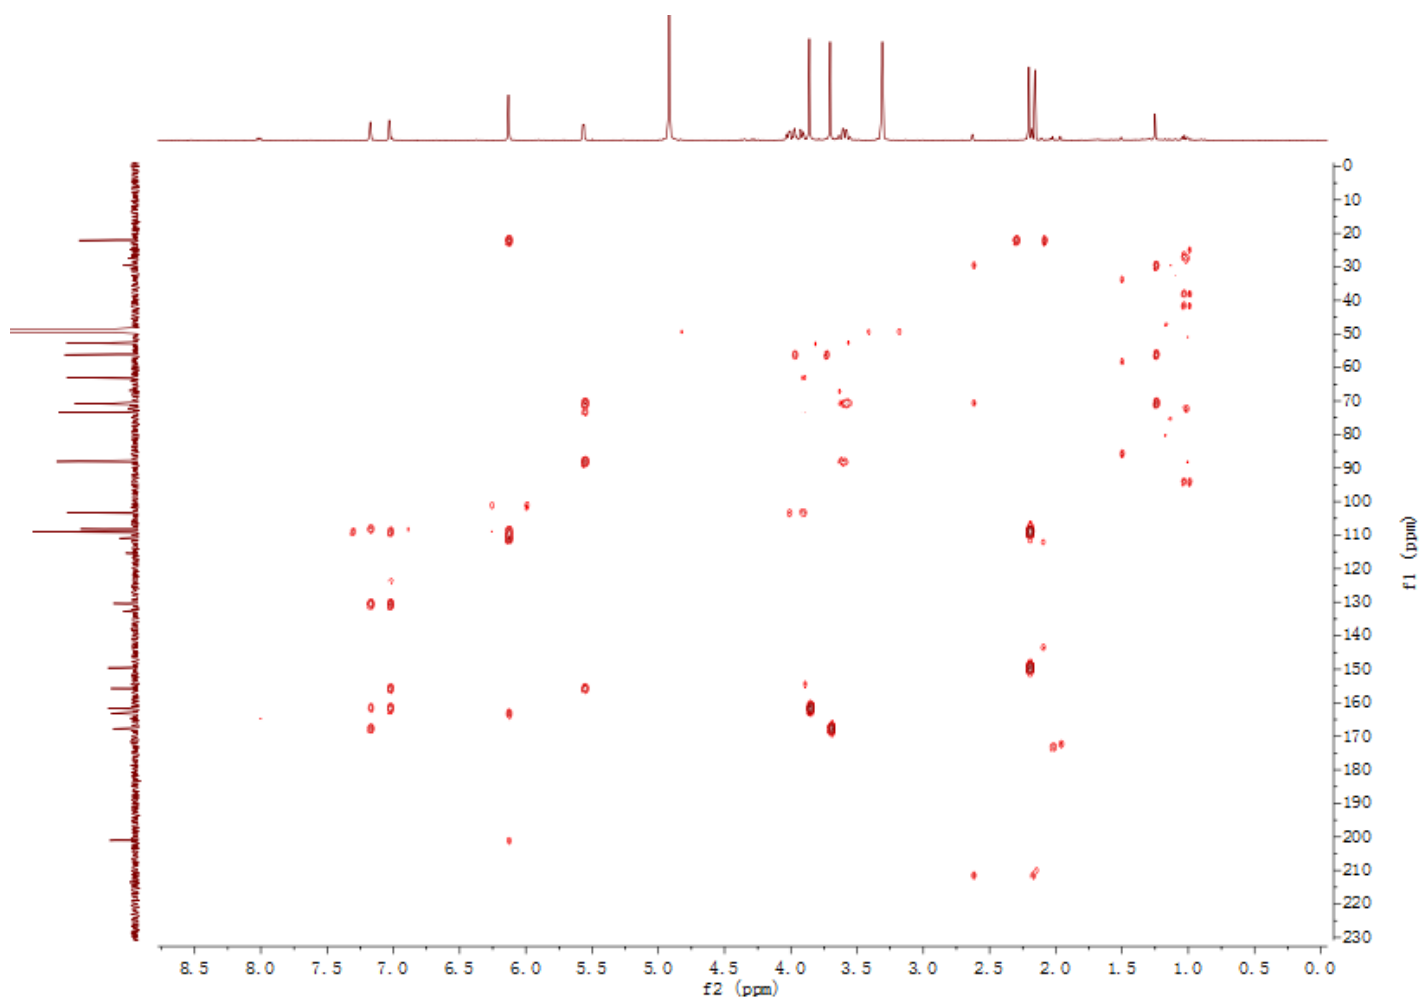

**Fig. S14**  $^1\text{H}$  NMR spectrum of pestalotione D (**8**; 400 MHz,  $\text{CDCl}_3$ )

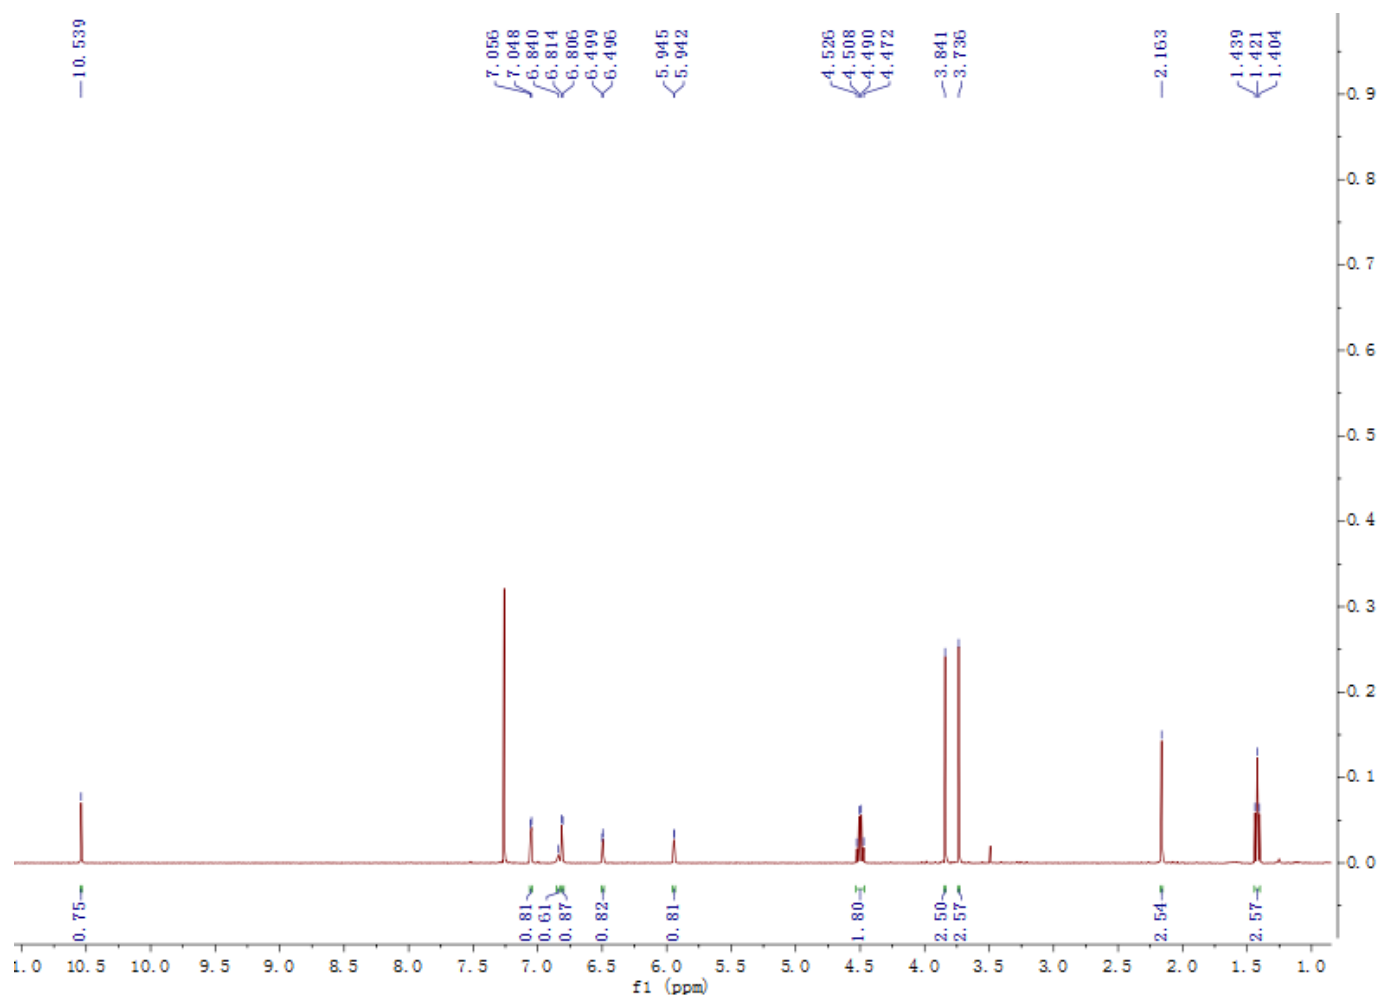



**Fig. S15**  $^{13}\text{C}$  NMR spectrum of pestalotione D (**8**; 100 MHz,  $\text{CDCl}_3$ )

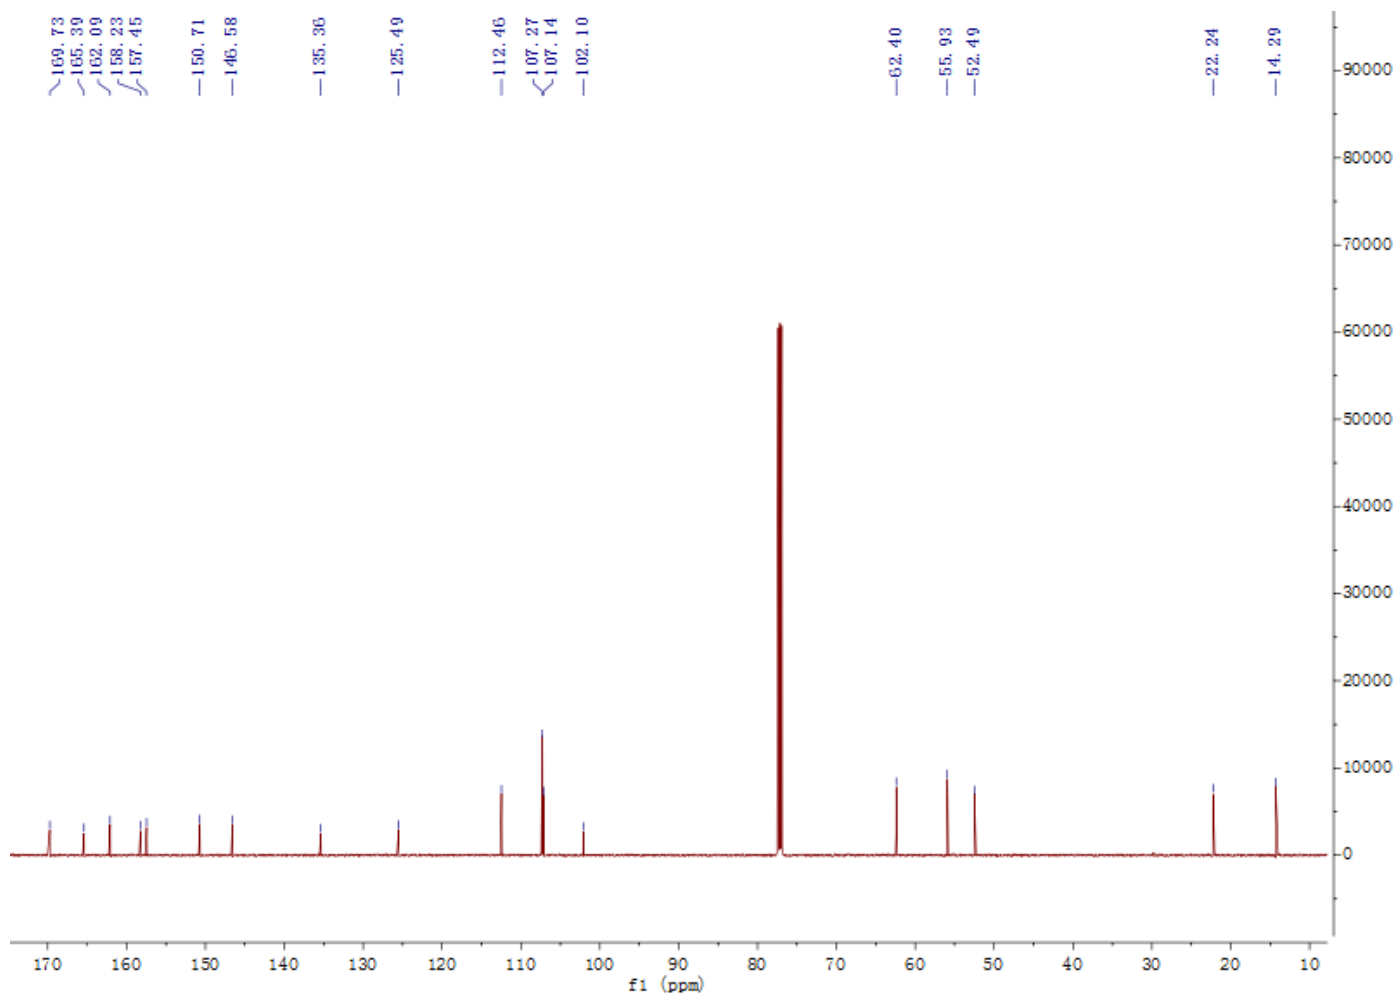

**Fig. S16** HSQC spectrum of pestalotione D (**8**; 400 MHz, CDCl<sub>3</sub>)

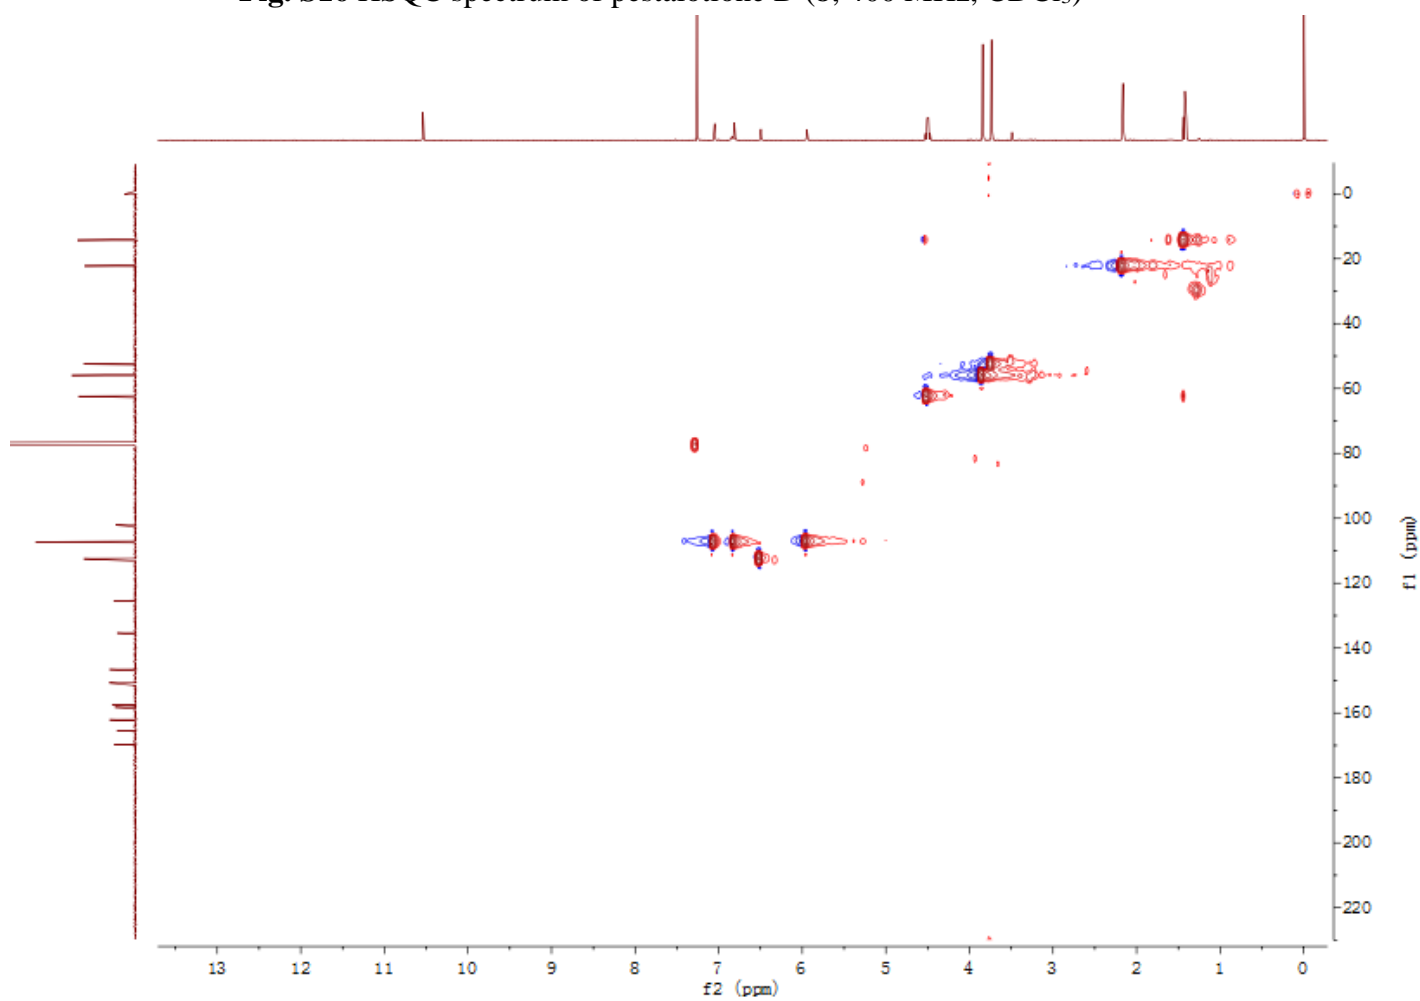

**Fig. S17** HMBC spectrum of pestalotione D (**8**; 400 MHz, CDCl<sub>3</sub>)

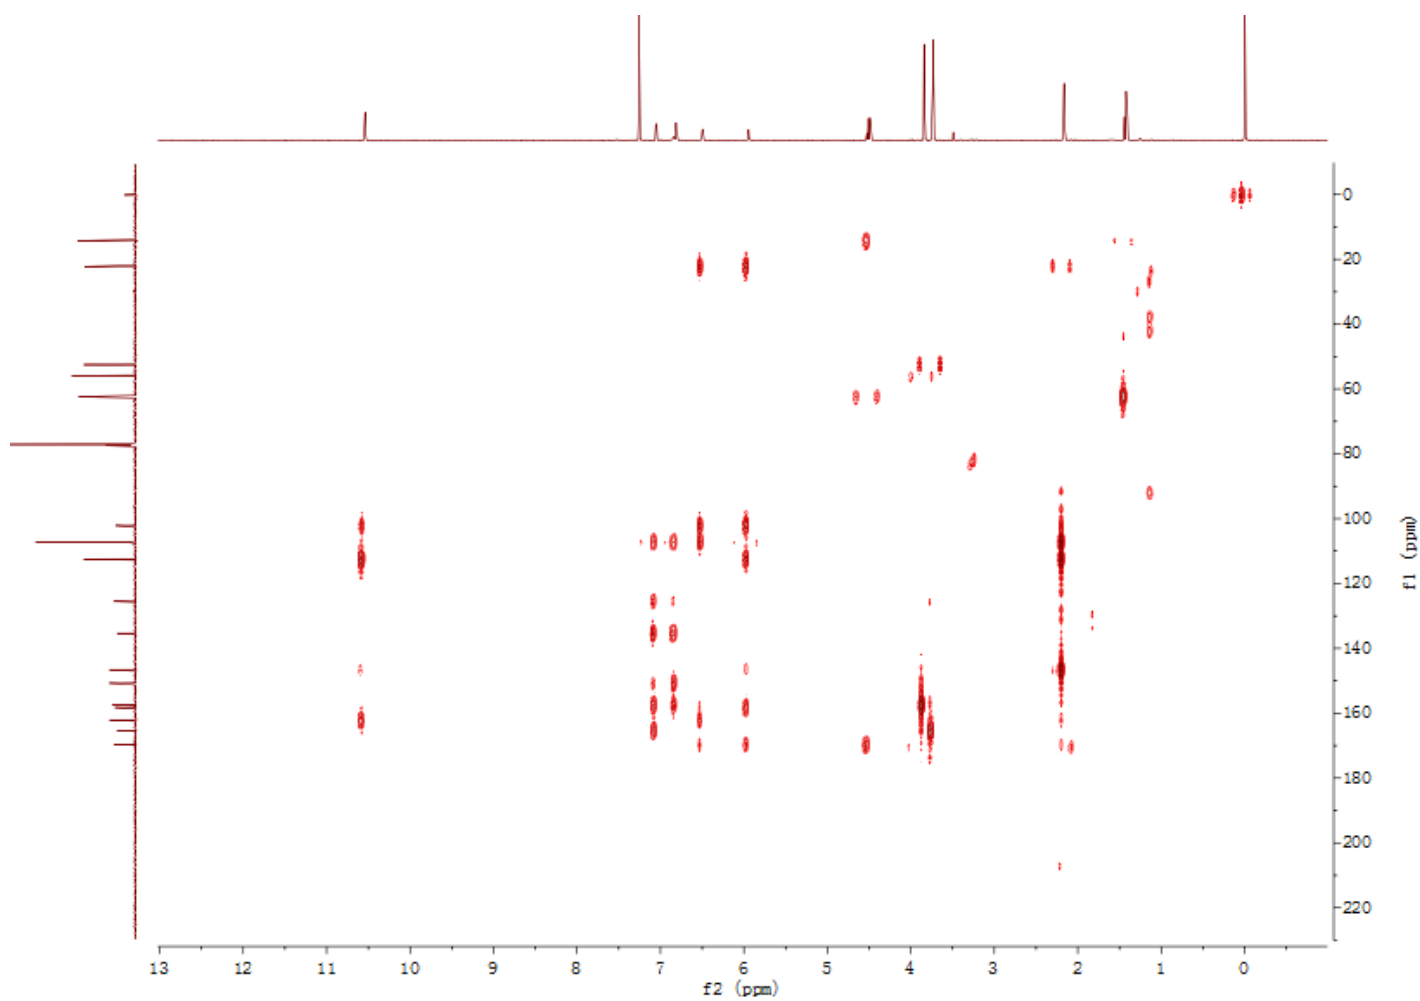

Supplement: molecules-25-00470-s001.pdf [file molecules-25-00470-s001.pdf]
